# Supplementary material for: Photoreversible DNA end capping for the formation of hairpin structures
Source: Royal Society of Chemistry journal article supplement (doi:10.1039/b924989c), 2010-01-01
Supplement: b924989c.pdf [file b924989c.pdf]

## **Electronic supplementary information**

### **Photoreversible DNA end capping for the formation of hairpin structures**

Yoshinaga Yoshimura, Hajime Okada, and Kenzo Fujimoto\*

School of Materials Science, Japan Advanced Institute of Science and Technology

1-1 Asahidai, Nomi, Ishikawa 923-1292 (Japan)

Fax: (+81) 761-51-1671

E-mail: kenzo@jaist.ac.jp

**Scheme S1.** Photochemical 5'-end capping of ODNs with <sup>CNV</sup>K.

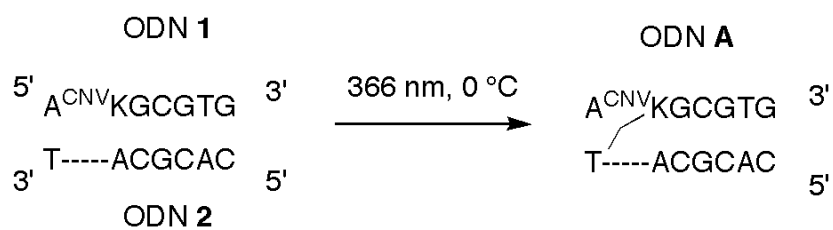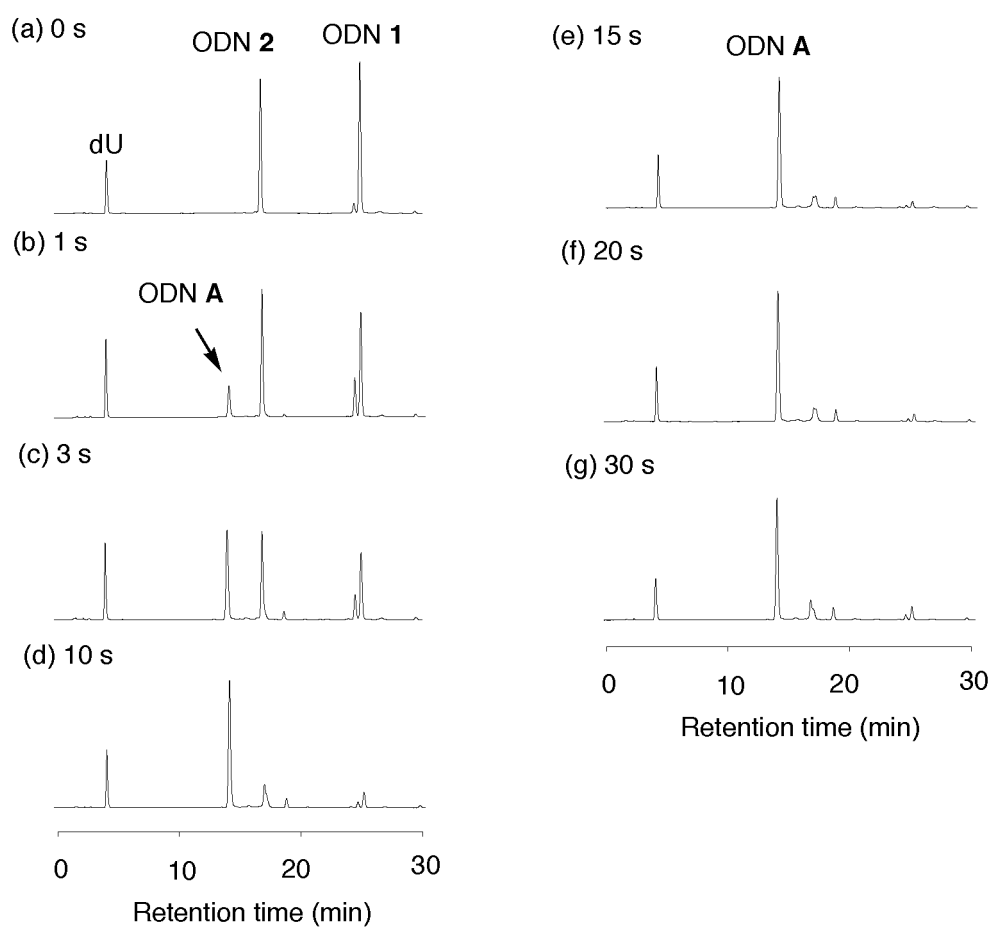

**Figure S1.** HPLC analysis of the irradiated ODN 1 in the presence of ODN 2. 2'-Deoxyuridine (dU) was used as an internal standard.



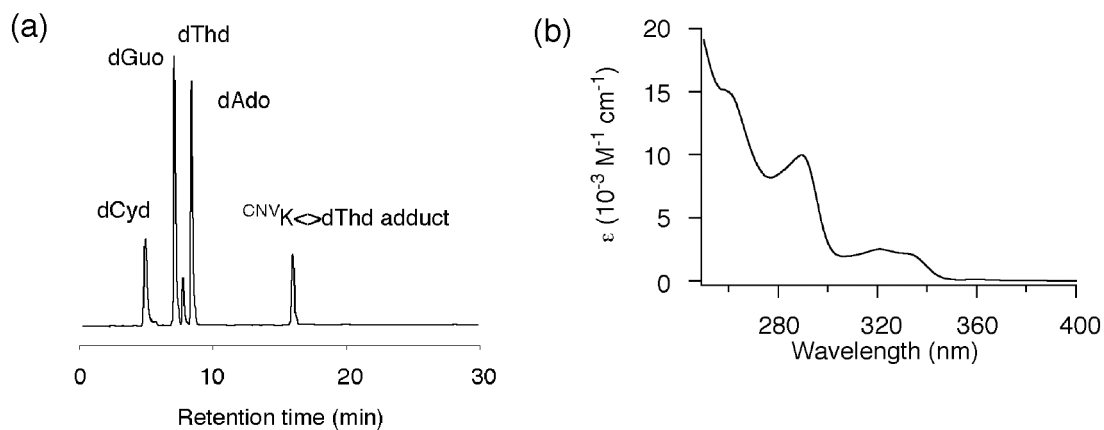

**Figure S3.** (a) HPLC analysis of products during enzymatic digestion process of ODN A, (b) UV spectrum of  $\text{CNV K} \leftrightarrow \text{T}$  photoadduct.

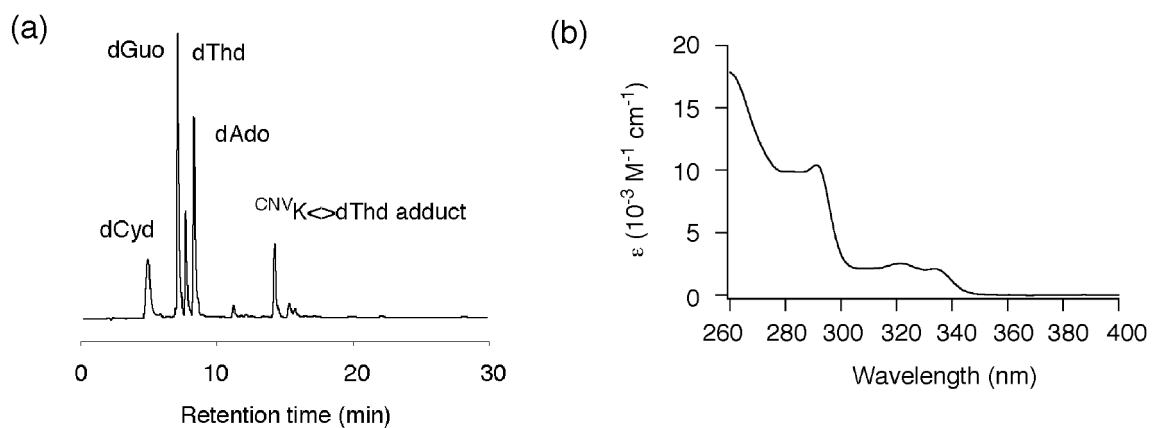

**Figure S4.** (a) HPLC analysis of products during enzymatic digestion process of ODN B, (b) UV spectrum of  $\text{CNV K} \leftrightarrow \text{T}$  photoadduct.

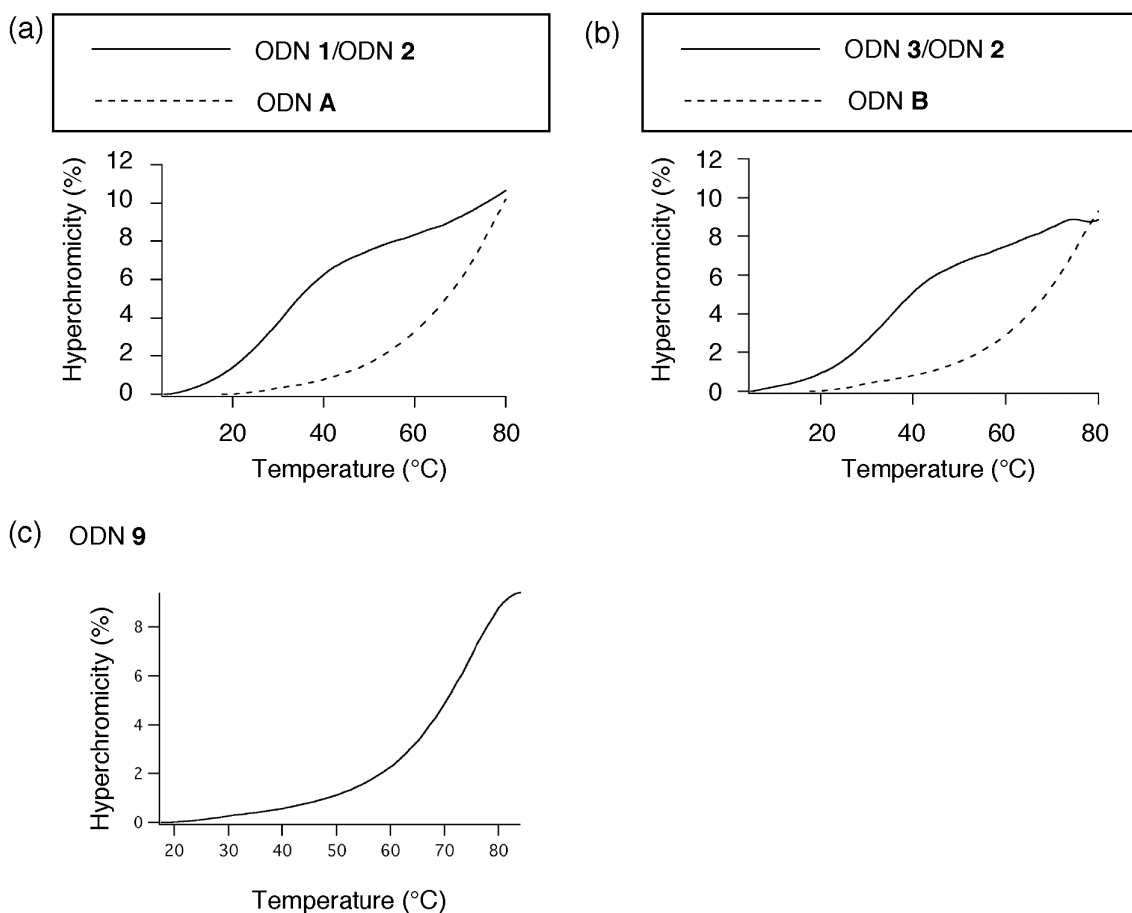

**Figure S5.** Melting curves: (a) the duplex ODN 1/ODN 2 and the end-capped ODN A; (b) the duplex ODN 3/ODN 2 and the end-capped ODN B; (c) ODN 9.

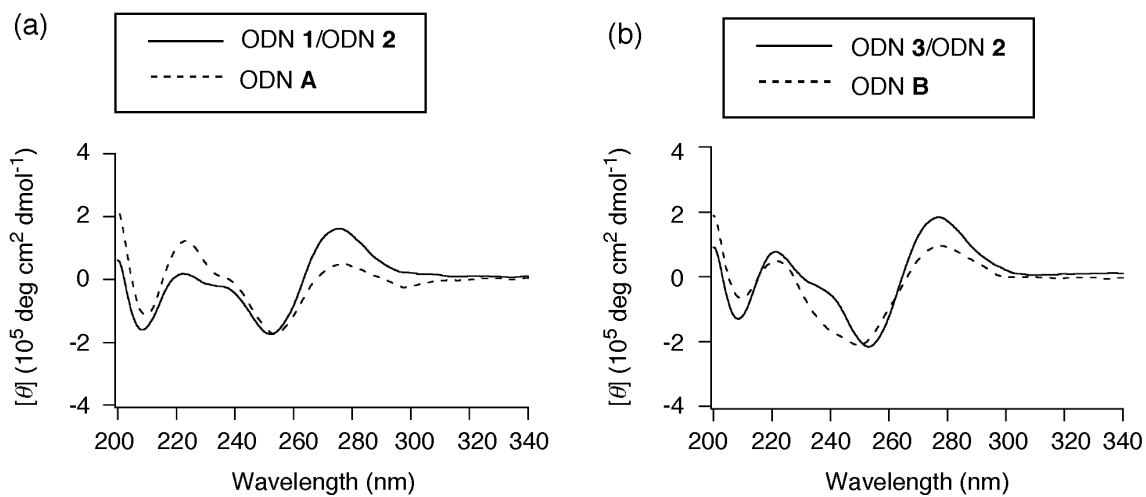

**Figure S6.** CD spectra: (a) the duplex ODN 1/ODN 2 and the end-capped ODN A; (b) the duplex ODN 3/ODN 2 and the end-capped ODN B.

**Scheme S3.** Photosplitting of the end-capped ODN.

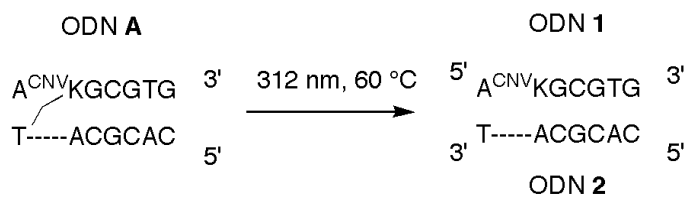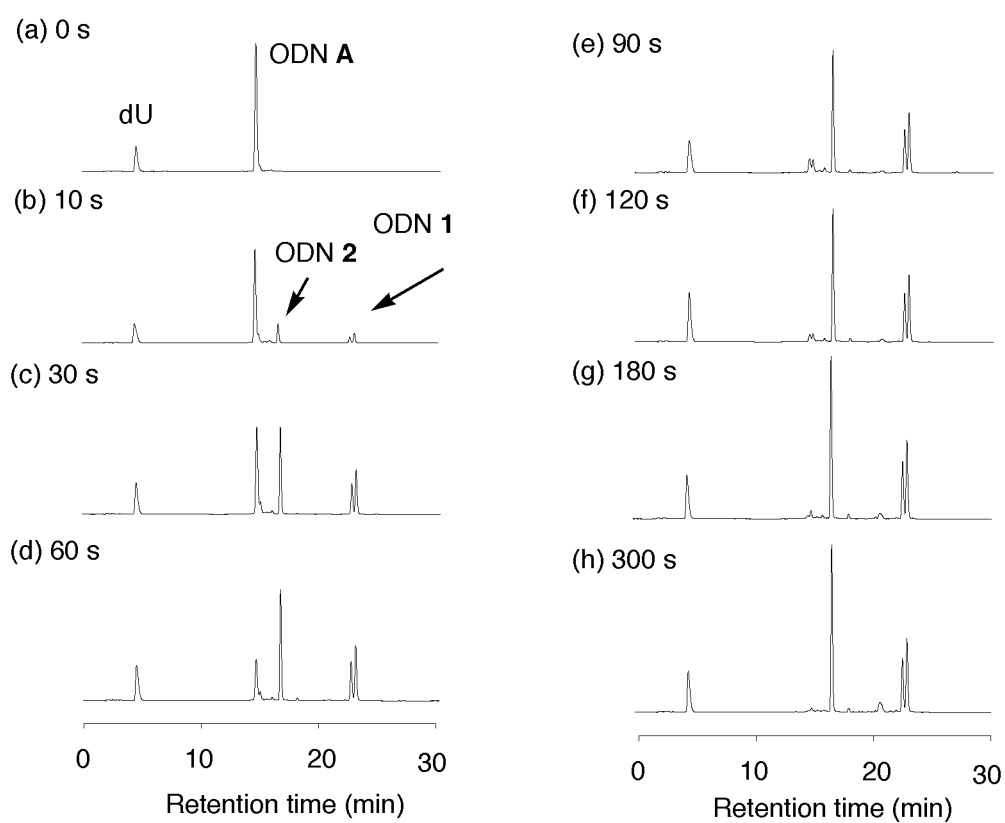

**Figure S7.** HPLC analysis of the photosplitting of ODN A. 2'-Deoxyuridine (dU) was used as an internal standard.

**Scheme S4.** Photoisomerization of ODN with <sup>CNV</sup>K.

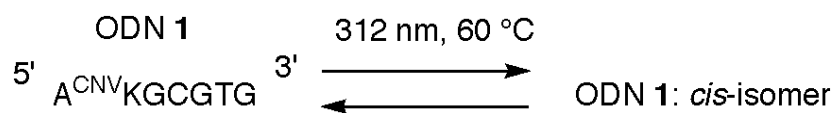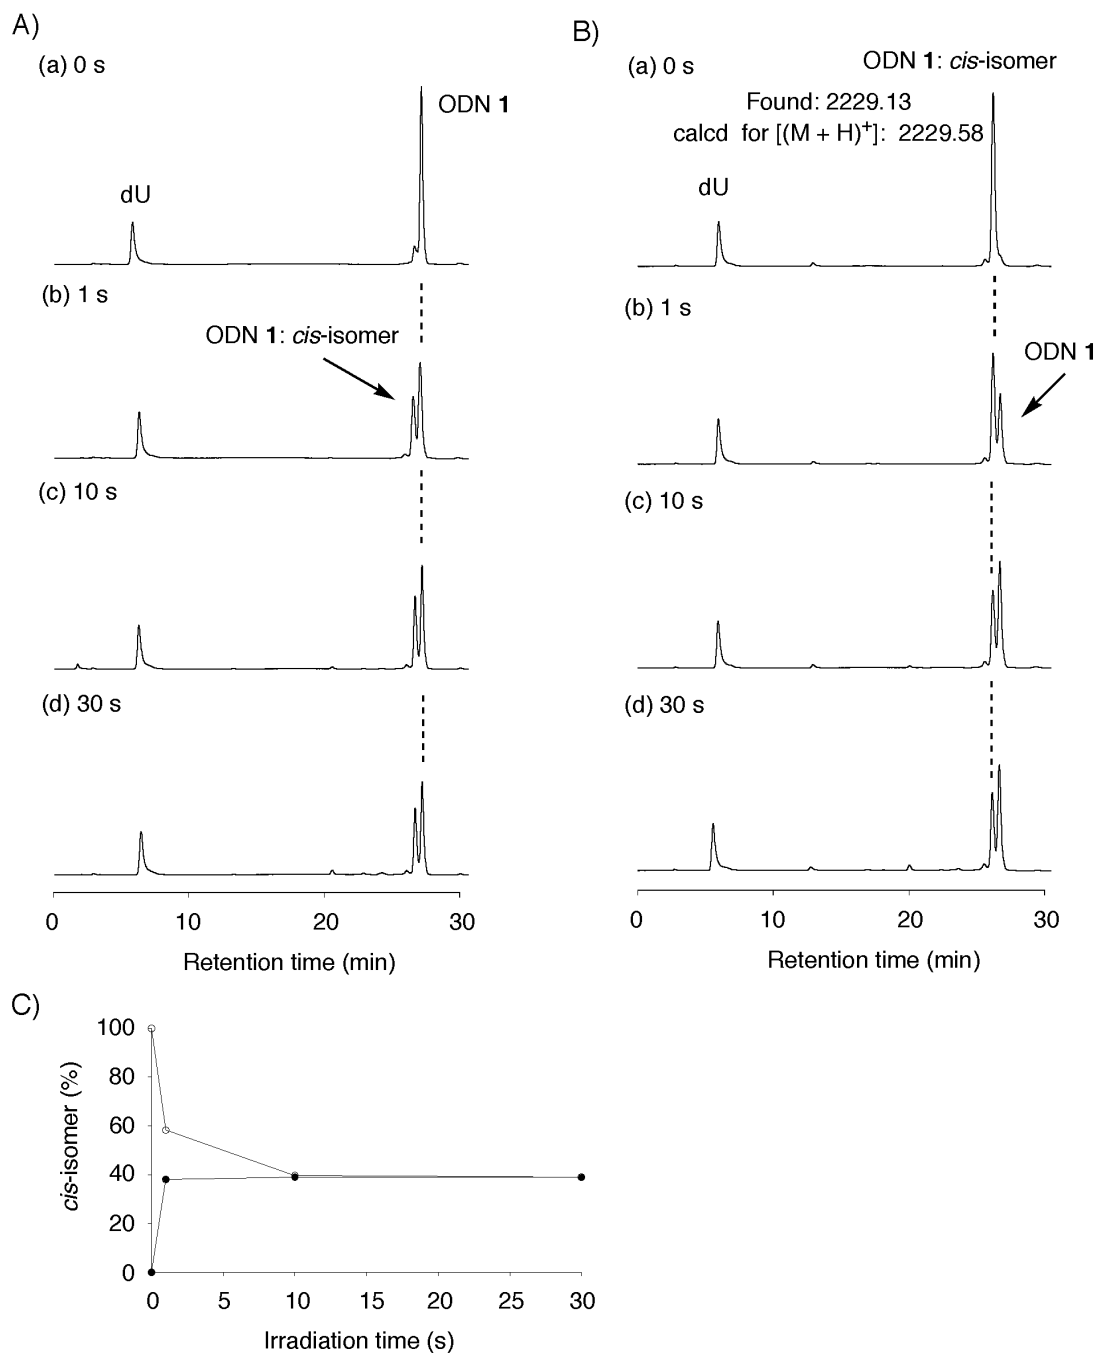

**Figure S8.** HPLC analysis of A) ODN 1 and B) ODN 1(*cis*-isomer). 2'-Deoxyuridine (dU) was used as an internal standard. C) Plot of %*cis* vs. irradiation time: ODN 1 (filled symbols) and ODN 1(*cis*-imer) (open symbols).

**Scheme S5.** Photosplitting of the end-capped ODN.

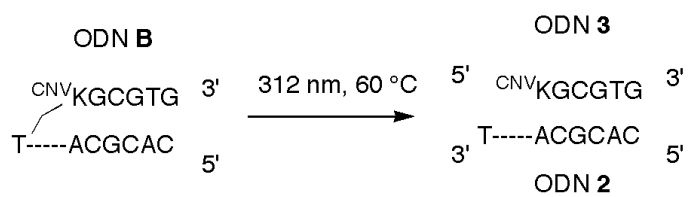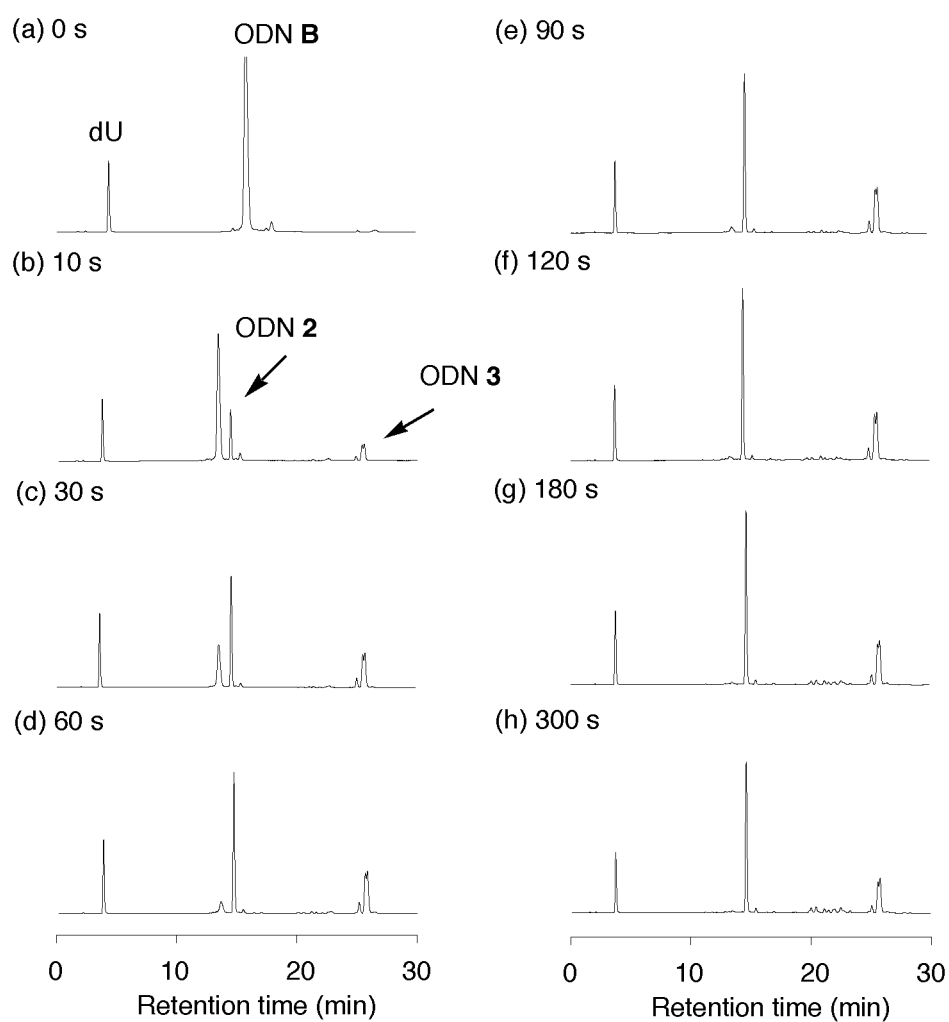

**Figure S9.** HPLC analysis of the photosplitting of ODN B. 2'-Deoxyuridine (dU) was used as an internal standard.







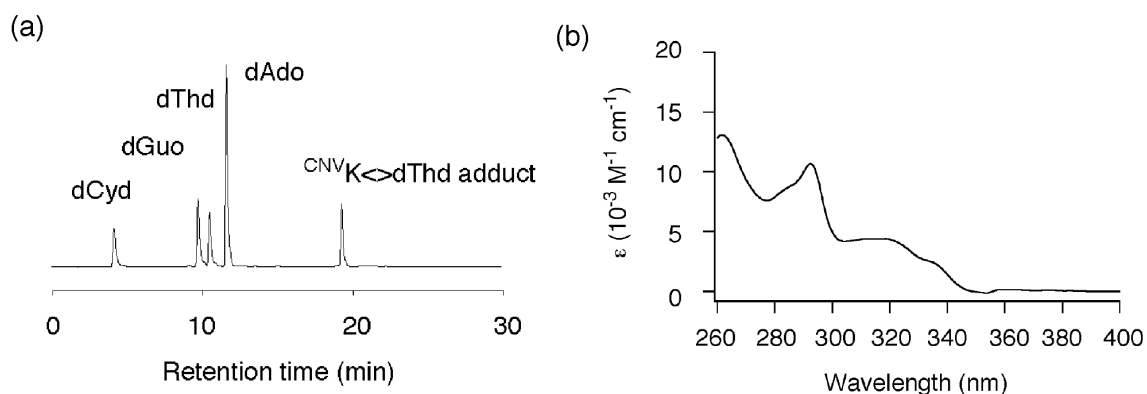

**Figure S12.** (a) HPLC analysis of products during enzymatic digestion process of ODN C, (b) UV spectrum of <sup>CNV</sup>K $\leftrightarrow$ T photoadduct.

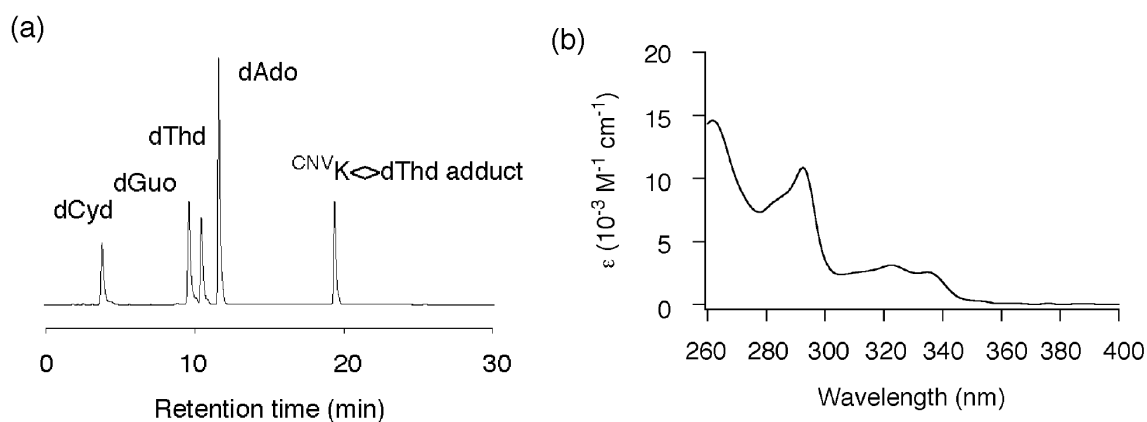

**Figure S13.** (a) HPLC analysis of products during enzymatic digestion process of ODN D, (b) UV spectrum of <sup>CNV</sup>K $\leftrightarrow$ T photoadduct.

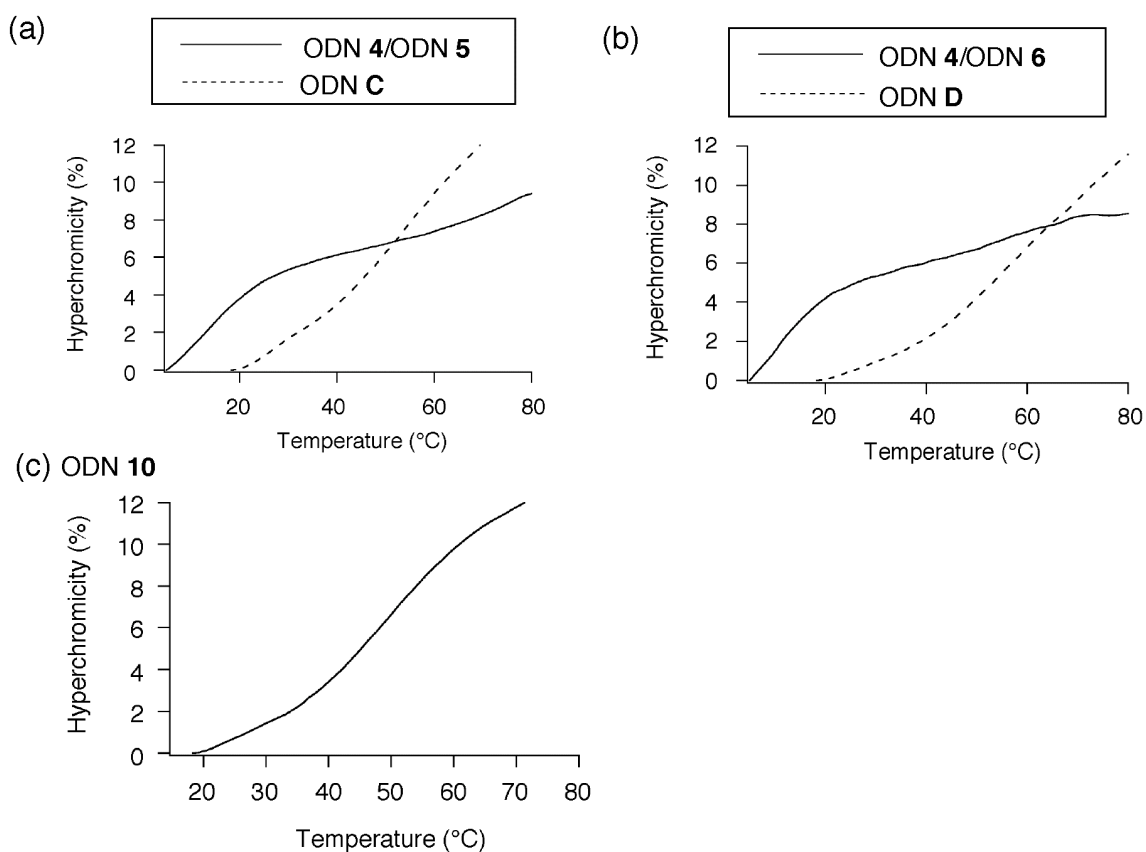

**Figure S14.** Melting curves: (a) the duplex ODN 4/ODN 5 and the end-capped ODN C; (b) the duplex ODN 4/ODN 6 and the end-capped ODN D; (c) ODN 10.

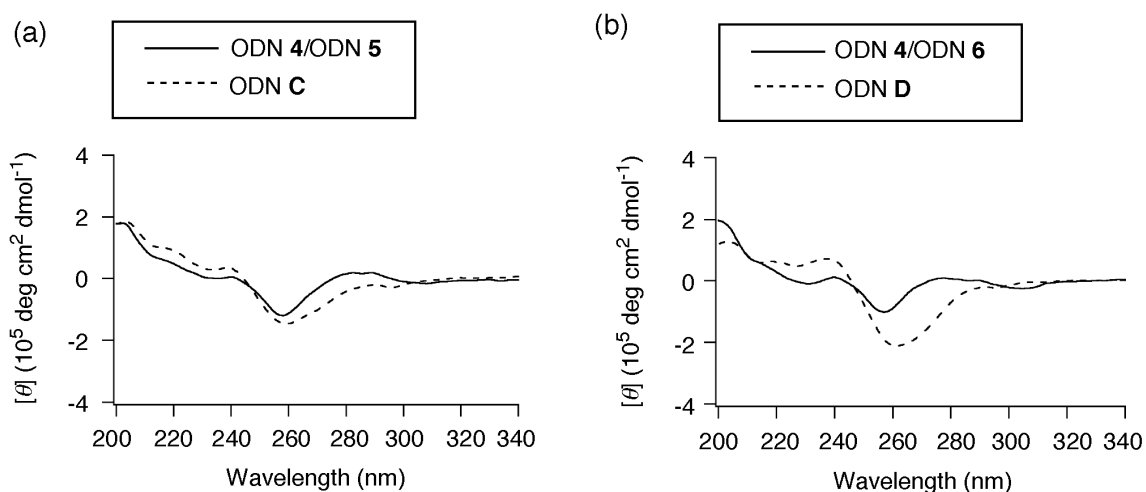

**Figure S15.** CD spectra: (a) the duplex ODN 4/ODN 5 and the end-capped ODN C; (b) the duplex ODN 4/ODN 6 and the end-capped ODN D.

**Scheme S8.** Photosplitting of the end-capped ODN.

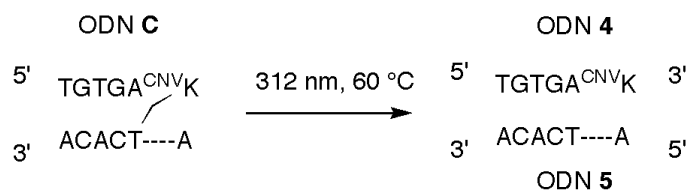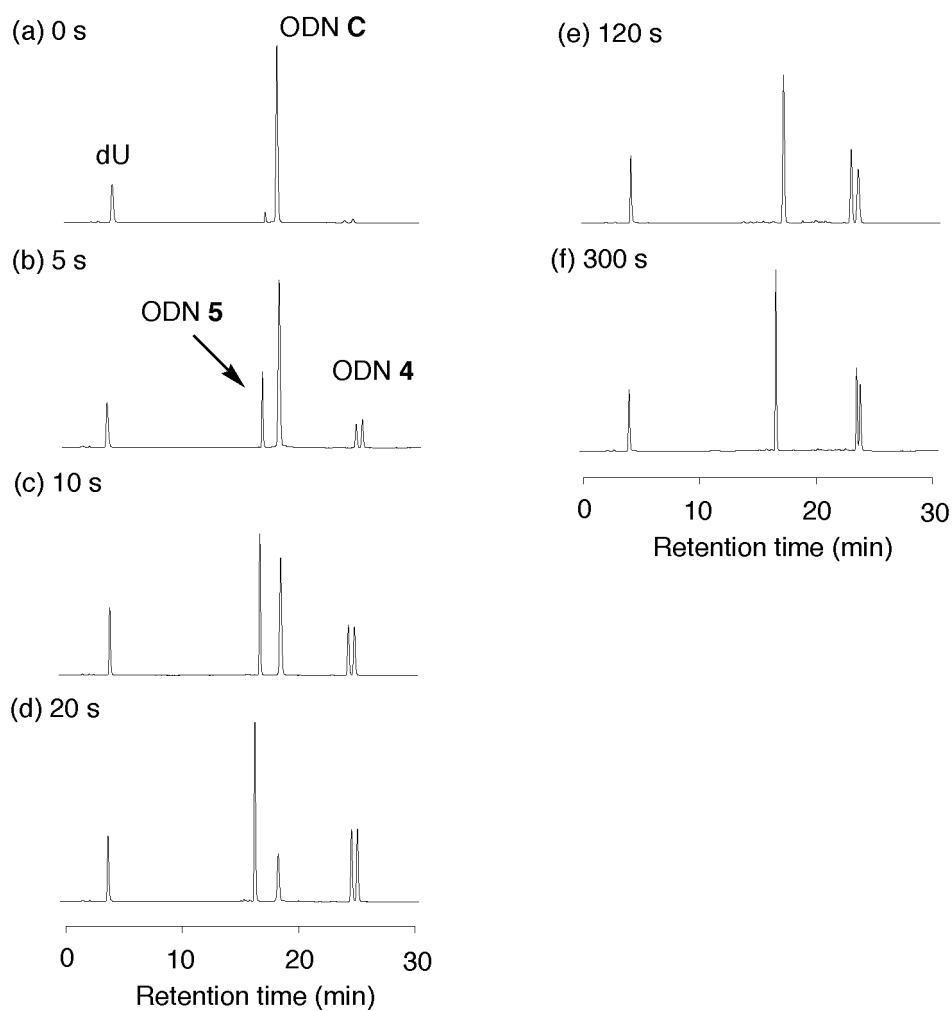

**Figure S16.** HPLC analysis of the photosplitting of ODN C. 2'-Deoxyuridine (dU) was used as an internal standard.

**Scheme S9.** Photoisomerization of ODN with <sup>CNV</sup>K.

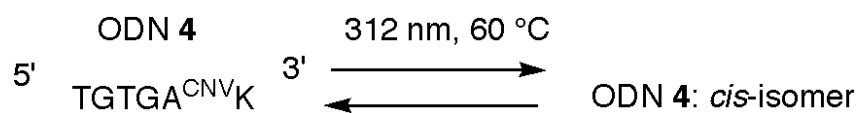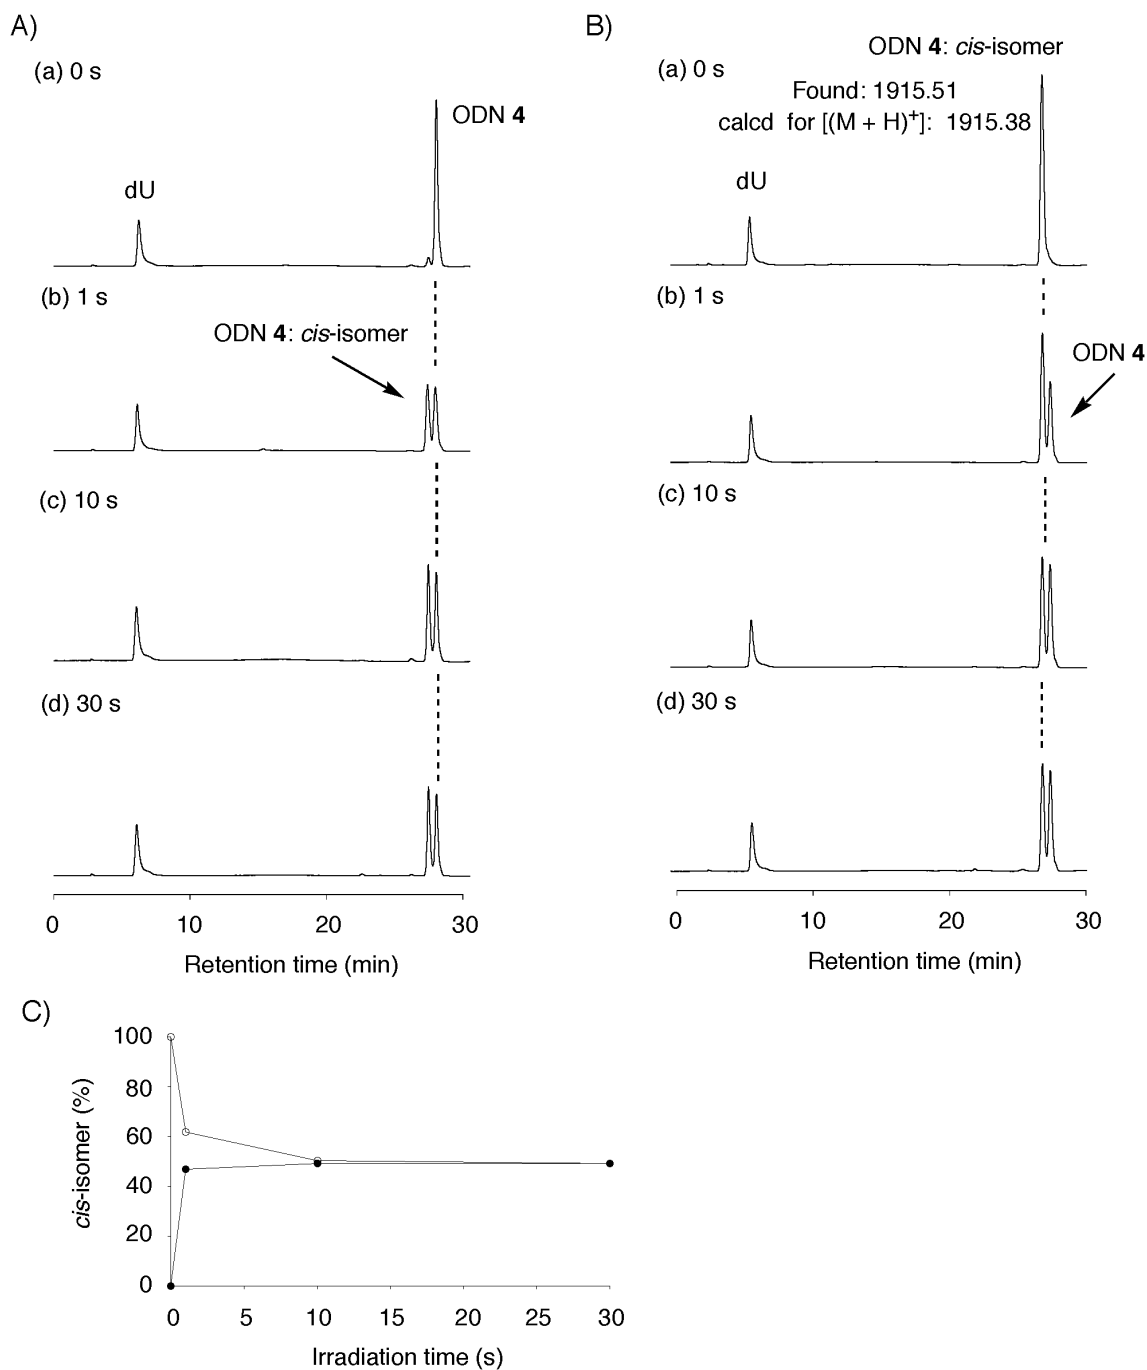

**Figure S17.** HPLC analysis of A) ODN 4 and B) ODN 4(*cis*-isomer). 2'-Deoxyuridine (dU) was used as an internal standard. C) Plot of %*cis* vs. irradiation time: ODN 4 (filled symbols) and ODN 4(*cis*-imer) (open symbols).

**Scheme S10.** Photosplitting of the end-capped ODN.

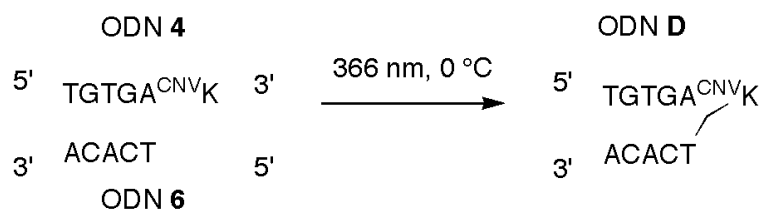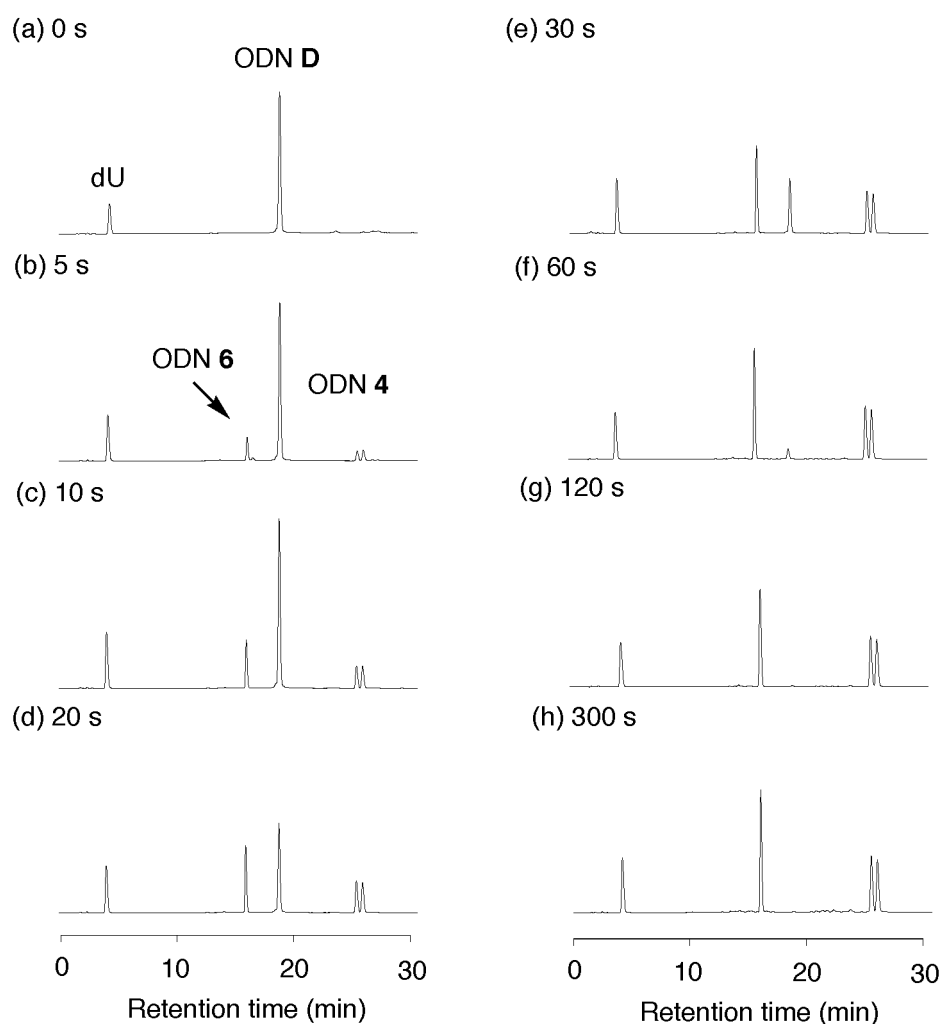

**Figure S18.** HPLC analysis of the photosplitting of ODN D. 2'-Deoxyuridine (dU) was used as an internal standard.

**Scheme S11.** Photochemical doubly end capping of ODNs with <sup>CNV</sup>K.

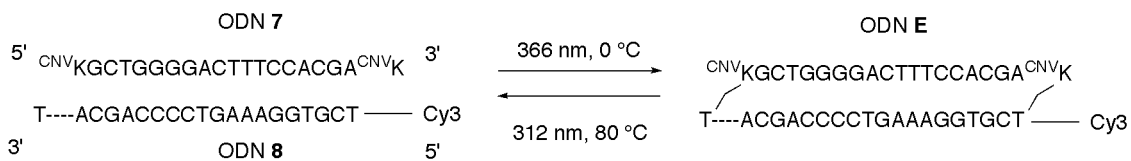

|        |   |   |   |
|--------|---|---|---|
| 366 nm | - | + | + |
| 312 nm | - | - | + |

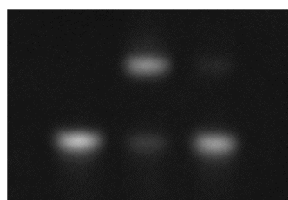

1      2      3

**Figure S19.** 16% PAGE of photoreversible end capping of Cy3-labeled ODN. Lane 1: duplex ODN 7/ODN 8 labeled with Cy3; lane 2: 366 nm irradiation of lane 1 for 40 s, 92% yield; lane 3: 312 nm irradiation of lane 2 for 90 s, 83% yield.

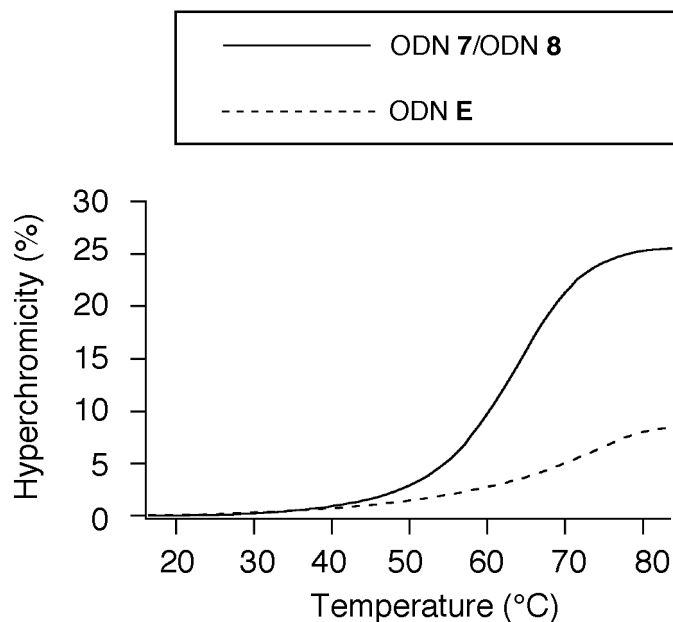

**Figure S20.** Melting curves: the duplex ODN 7/ODN 8 and the end-capped ODN E.  $T_m$  values of the duplex ODN 7/ODN 8 and the end-capped ODN E were measured in 50 mM sodium cacodylate buffer (pH 7.0) and 5 mM sodium chloride.



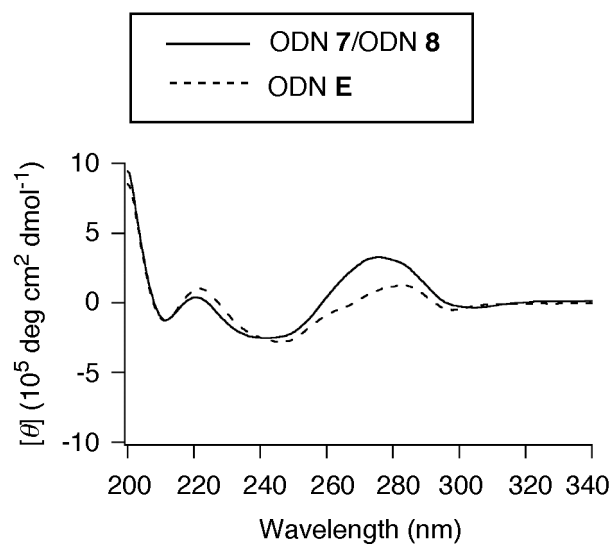

**Figure S21.** CD spectra: the duplex ODN 7/ODN 8 and the end-capped ODN E.

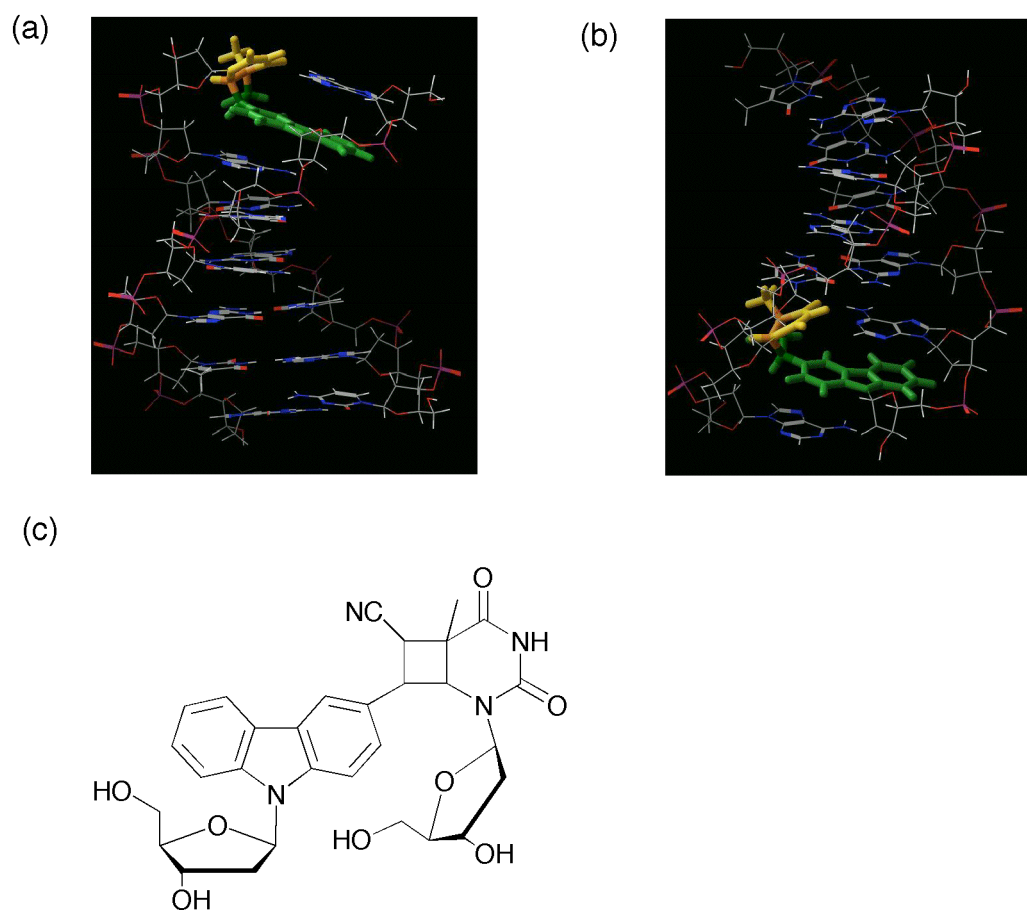

**Figure S22.** (a) Molecular modeling of stacked geometry in the end capped ODN **A**. (b) Molecular modeling of stacked geometry in the end capped ODN **C**. Yellow, and green molecules are T, and <sup>CNV</sup>K, respectively. (c) Proposed structure of <sup>CNV</sup>K $\leftrightarrow$ T photoadduct.
